# Supplementary material for: Unravelling the sex-specific diversity and functions of adrenal gland macrophages
Source: PubMed Central journal article supplement (PMC9210345; doi:10.1016/j.celrep.2022.110949), 2022-06-14
Supplement: mmc1.pdf [file mmc1.pdf]

## Supplemental information

### Unravelling the sex-specific diversity and functions of adrenal gland macrophages

**Bastien Dolfi, Alexandre Gallerand, Maria M. Firulyova, Yingzheng Xu, Johanna Merlin, Adélie Dumont, Alexia Castiglione, Nathalie Vaillant, Sandrine Quemener, Heidi Gerke, Marion I. Stunault, Patricia R. Schrank, Seung-Hyeon Kim, Alisha Zhu, Jie Ding, Jerome Gilleron, Virginie Magnone, Pascal Barbry, David Dombrowicz, Christophe Duranton, Abdelilah Wakkach, Claudine Blin-Wakkach, Burkhard Becher, Sophie Pagnotta, Rafael J. Argüello, Pia Rantakari, Svetoslav Chakarov, Florent Ginhoux, Konstantin Zaitsev, Ki-Wook Kim, Laurent Yvan-Charvet, Rodolphe R. Guinamard, Jesse W. Williams, and Stoyan Ivanov**

## Sup. Table 1

| gene     | p_val                | avg_logFC (female over male) | pct.1 | pct.2 | p_val_adj            |
|----------|----------------------|------------------------------|-------|-------|----------------------|
| Xist     | 0                    | 1.54951258733711             | 0.828 | 0     | 0                    |
| Rpl35    | 7.62774369759271e-40 | 0.3327951311151709           | 0.975 | 0.916 | 1.1416443992187e-35  |
| Apoc2    | 3.69158130258448e-26 | 0.332692544859788            | 0.379 | 0.167 | 5.52518973557819e-22 |
| AA467197 | 6.22673290146039e-23 | 0.369648525877762            | 0.16  | 0.037 | 9.31955113361576e-19 |
| Lyz2     | 2.17567047442043e-22 | 0.386902156024932            | 0.999 | 0.999 | 3.25632599906506e-18 |
| Tsc22d3  | 6.49050153643698e-22 | 0.329842436397367            | 0.611 | 0.429 | 9.71433364958522e-18 |
| Fxyd5    | 8.32816037140203e-22 | 0.27680960279782             | 0.944 | 0.892 | 1.24647576278774e-17 |
| Ap1s2    | 1.73034399696515e-21 | 0.294384138791506            | 0.516 | 0.367 | 2.58980586025774e-17 |
| Sla      | 3.91862476256913e-20 | 0.266959924479275            | 0.497 | 0.332 | 5.86500568213722e-16 |
| Ly6a     | 1.0545988034916e-15  | 0.366701350118315            | 0.206 | 0.097 | 1.57841802918587e-11 |
| Cebpb    | 8.00698976030681e-15 | 0.250943124974004            | 0.712 | 0.549 | 1.19840615742512e-10 |
| Msrb1    | 5.40275053801241e-14 | 0.275219903461956            | 0.558 | 0.398 | 8.08629673024318e-10 |
| Tmsb10   | 4.60848480745743e-12 | 0.380808925495099            | 0.801 | 0.725 | 6.89751921132154e-08 |
| Ms4a4c   | 8.66898423345473e-11 | 0.25134064025716             | 0.4   | 0.286 | 1.29748687022117e-06 |
| Chil3    | 4.8237747978503e-10  | 0.394563532638321            | 0.186 | 0.087 | 7.21974373994254e-06 |
| Ifitm3   | 3.73254227181447e-08 | 0.266876571843615            | 0.88  | 0.835 | 0.000558649601822472 |
| Ly6c2    | 3.5363257330096e-07  | 0.29637517528339             | 0.18  | 0.097 | 0.00529281872459546  |
| Plac8    | 4.98692265535371e-07 | 0.460921076326878            | 0.294 | 0.193 | 0.0074639271382679   |
| Apoe     | 7.50291402455461e-07 | 0.48830922785863             | 0.969 | 0.955 | 0.0112296114205509   |
| S100a6   | 1.08763499763158e-06 | 0.276562829675311            | 0.591 | 0.514 | 0.0162786330095518   |

### Table S1.

List of genes differentially expressed among myeloid cells in female and male mice. This table is related to figure 2.

Sup. Fig. 1

A.

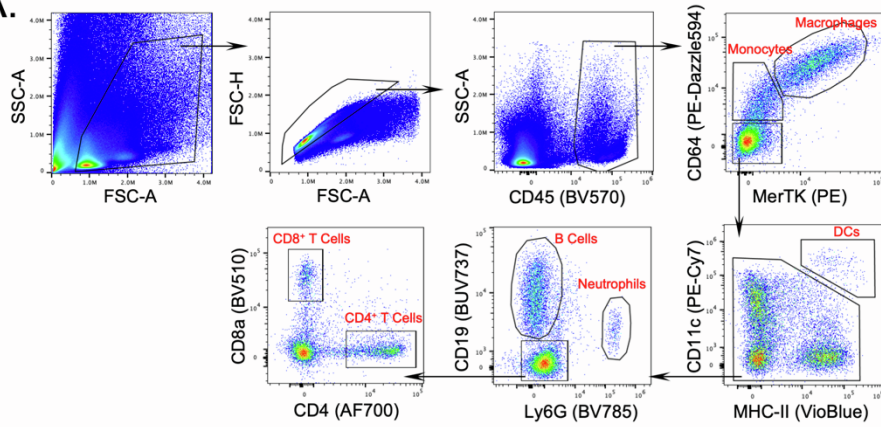

B.

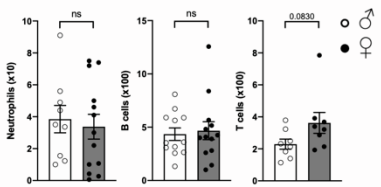

C.

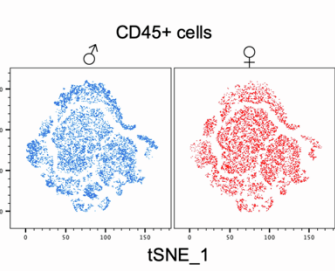

D.

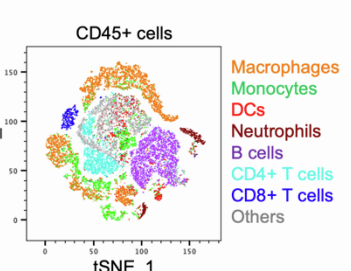

E.

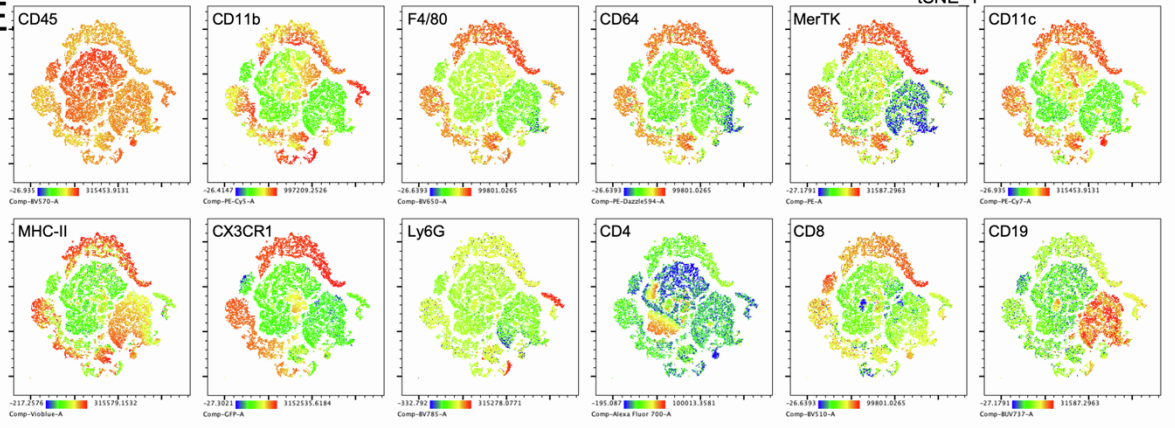

F.

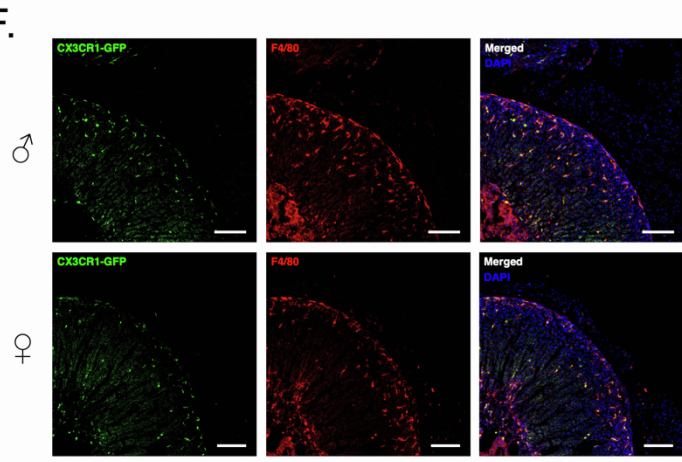

G.

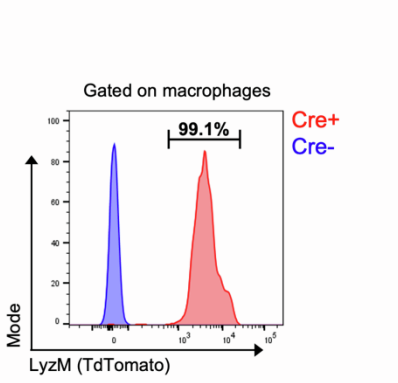

**Figure S1. Flow cytometry analysis of immune cell diversity in male and female adrenal glands. This figure is complementary to figure 1.**

(A) Gating strategy used to identify adrenal gland immune cells. Concatenated data from 8 7-week-old female mice. (B) Quantification of neutrophils (♂ n=9 and ♀ n=13), B cells (♂ n=12 and ♀ n=13) and T cells (♂ n=8 and ♀ n=8) in male and female adrenal glands. Data pooled from one (T cells) or two (neutrophils and B cells) independent experiments. (C) Clustering of CD45<sup>+</sup> adrenal gland cells from male and female CX3CR1<sup>GFP</sup> mice using unsupervised t-distributed stochastic neighbor embedding (tSNE) analysis of flow cytometry data. Panel : CD40 (BUV395) ; CD24 (BUV496) ; CD80 (BUV615) ; CD19 (BUV737) ; F4/80 (BV650) ; Ly6G (BV785) ; CX3CR1 (GFP reporter) ; MerTK (PE) ; CD64 (PE-Dazzle594) ; CD11b (PE-Cy5) ; CD206 (PerCP-Cy5.5) ; Timd4 (PerCP-eFluor710) ; CD11c (PE-Cy7) ; Lyve1 (eFluor660) ; CD4 (AF700) ; CCR2 (APC-Fire750). (D) Identification of adrenal gland immune subsets. Cells were gated manually and overlaid on tSNE plot to identify clusters. Macrophages : CD45<sup>+</sup> CD64<sup>+</sup> MerTK<sup>+</sup>. Monocytes : CD45<sup>+</sup> MerTK<sup>-</sup> CD11b<sup>+</sup> CX3CR1<sup>+</sup>. Dendritic Cells (DCs) : CD45<sup>+</sup> MerTK<sup>-</sup> CD11c<sup>+</sup> MHC-II<sup>+</sup>. Neutrophils : CD45<sup>+</sup> CD11b<sup>+</sup> Ly6G<sup>+</sup>. B cells : CD45<sup>+</sup> MerTK<sup>-</sup> CD11c<sup>-</sup> MHC-II<sup>+</sup> CD19<sup>+</sup>. CD4<sup>+</sup> T cells : CD45<sup>+</sup> MerTK<sup>-</sup> MHC-II<sup>-</sup> CD4<sup>+</sup>. CD8<sup>+</sup> T cells : CD45<sup>+</sup> MerTK<sup>-</sup> MHC-II<sup>-</sup> CD8<sup>+</sup>. (E) tSNE representation of the expression levels of CD45, CD11b, F4/80, CD64, MerTK, CD11c, MHC-II, CX3CR1, Ly6G, CD4, CD8 and CD19 among adrenal gland CD45<sup>+</sup> cells. (F) Microscopy analysis of F4/80 staining in adrenal glands of CX3CR1<sup>GFP/+</sup> mice. Scale bar : 100µm. (G) Flow cytometry analysis of TdTomato expression in adrenal gland macrophages from 8-week-old male Lyz2<sup>cre</sup> x R26<sup>TdTomato</sup> mice. Data from one experiment. All data are represented in means ± SEM. Statistical analysis was performed using two-tailed Mann-Whitney tests. ns p>0.05 ; \* p<0.05 ; \*\* p<0.01 ; \*\*\* p<0.001 ; \*\*\*\* p<0.0001.

# Sup. Fig. 2

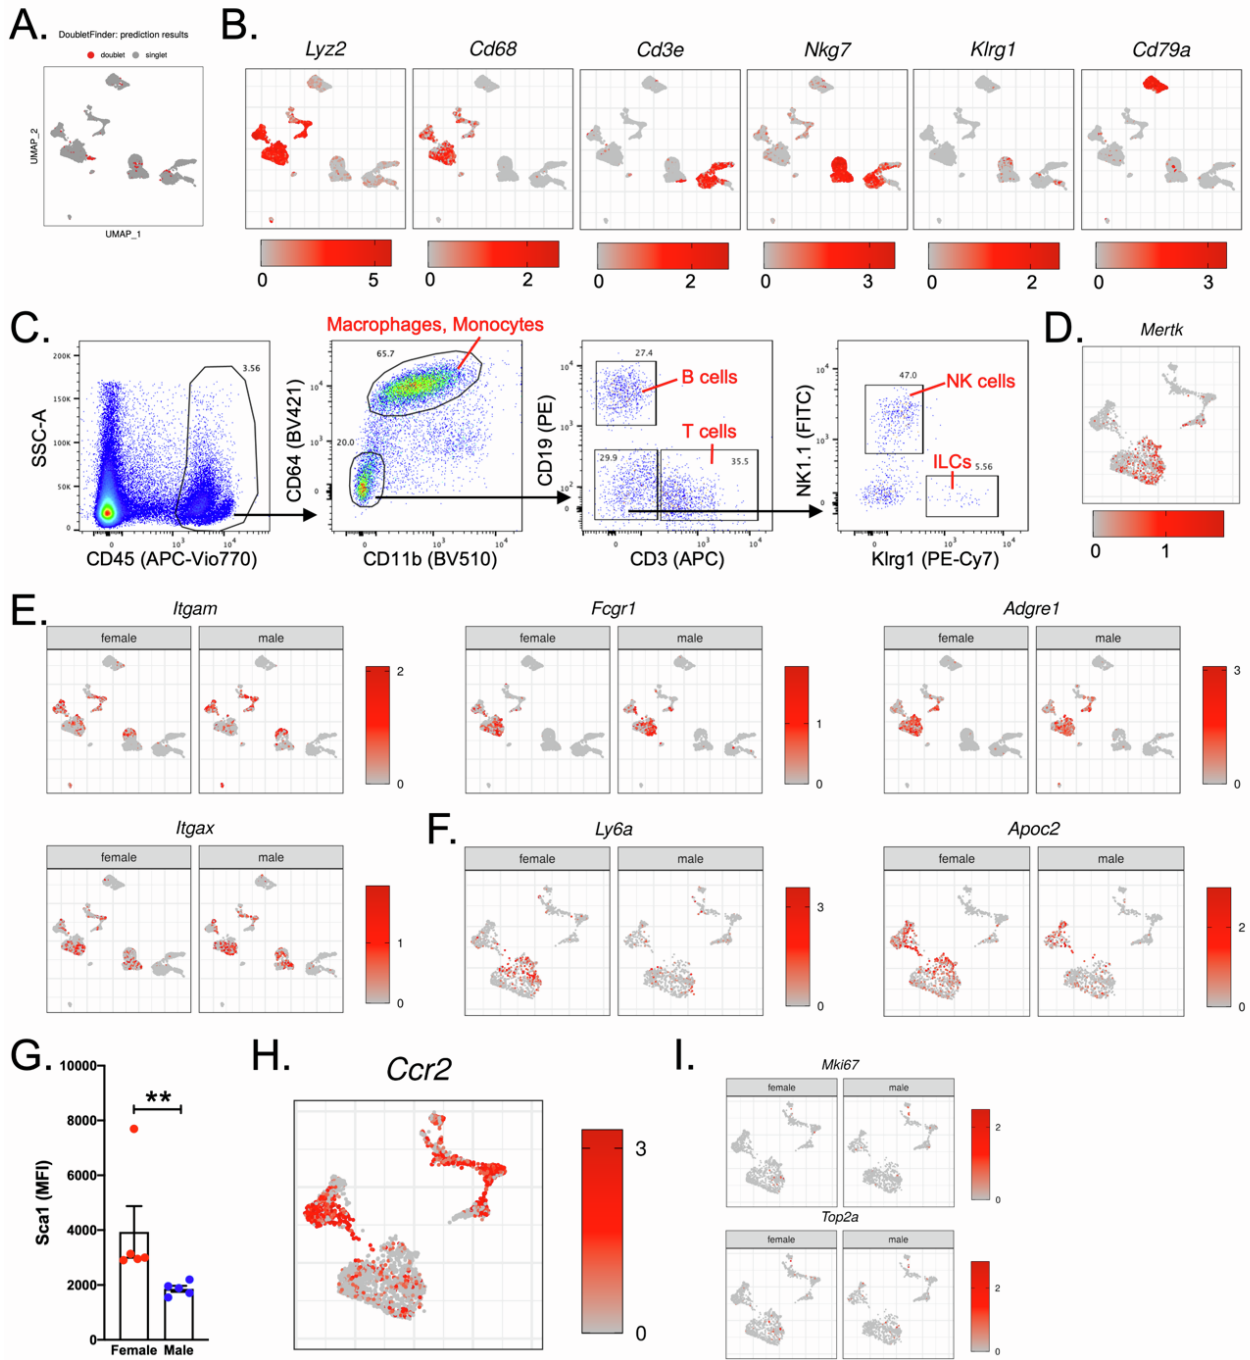

**Figure S2. Single cell RNA-seq analysis of adrenal gland immune cell diversity. This figure is complementary to figure 2.**

(A) Identification of doublets in scRNA-seq data using the DoubletFinder package. Doublets were removed from analysis. (B) scRNA-seq analysis of genes used to identify cell types (*Lyz2*, *CD68*, *CD3e*, *Nkg7*, *Klrg1* and *CD79a*). (C) Flow cytometry plots validating the presence of immune cell types corresponding to clusters identified in the scRNA-seq analysis. (D) scRNA-seq analysis of *Mertk* expression among adrenal gland myeloid cells. (E) scRNA-seq analysis of myeloid cell canonical markers by adrenal gland CD45<sup>+</sup> cells from 7-week-old male and female mice. (F) scRNA-seq analysis of sex-enriched genes in adrenal gland myeloid cells. (G) Flow cytometry analysis of Sca1 expression in female and male mice (n=5 mice per group). Data pooled from two independent experiments. (H) scRNA-seq analysis of *CCR2* expression among adrenal gland myeloid cells. (I) scRNA-seq analysis of *Mki67* and *Top2a* mRNA expression. All data are represented in means  $\pm$  SEM. Statistical analysis was performed using two-tailed Mann-Whitney tests. ns p>0.05 ; \* p<0.05 ; \*\* p<0.01 ; \*\*\* p<0.001 ; \*\*\*\* p<0.0001.



# Sup. Fig. 3

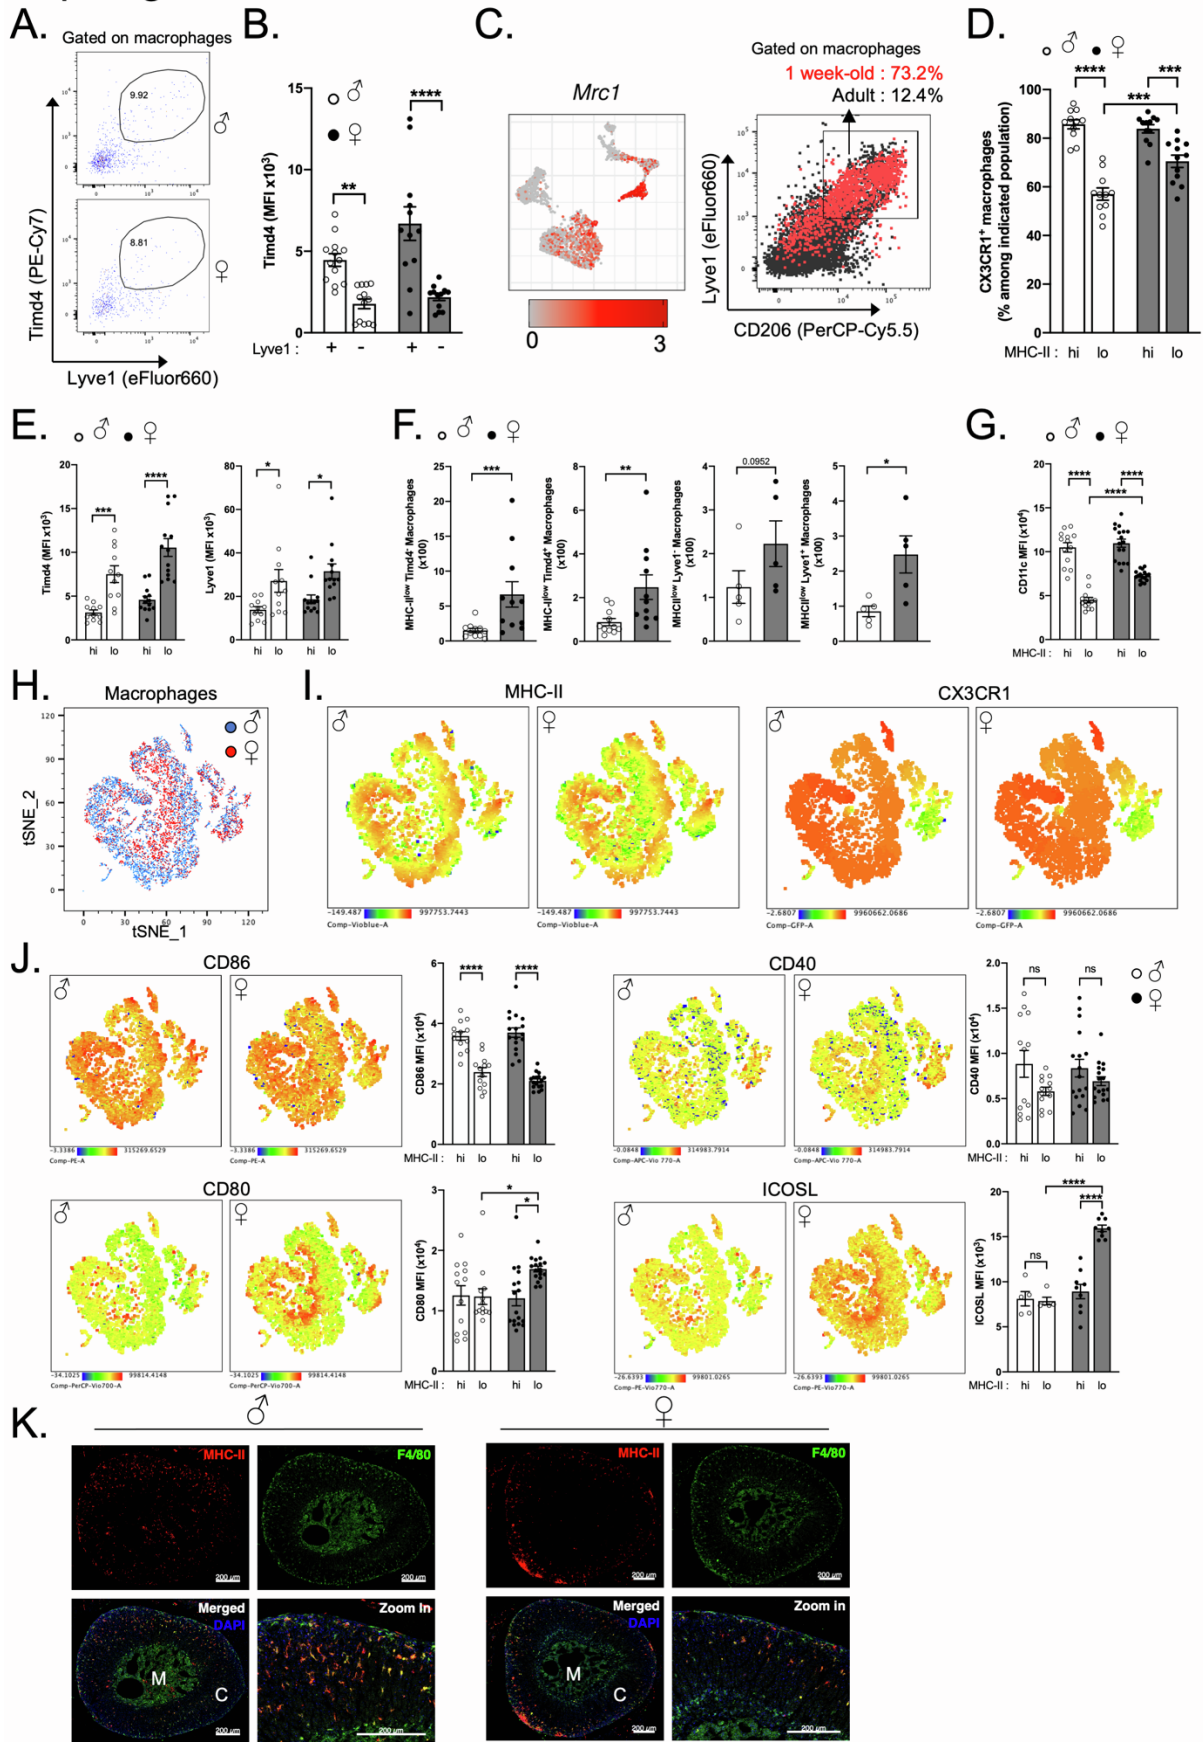

**Figure S3. MHC-II expression identifies two macrophage populations with sex-specific abundance and distribution. This figure is complementary to figures 3 and 4.**

(A) Representative plots showing adrenal gland macrophage Timd4 and Lyve1 expression in male and female mice. Data representative of at least 3 independent experiments. (B) Mean Timd4 fluorescence intensity among Lyve1<sup>+</sup> and Lyve1<sup>-</sup> macrophage subsets in male and female mice. ♂ n=13 and ♀ n=12. Data pooled from 2 independent experiments. (C) (Left) scRNA-seq analysis of *Mrc1* mRNA expression and (Right) representative plot showing adrenal gland macrophage Lyve1 and CD206 expression in 1- and 9-week-old male mice. Data from one experiment. (D) Proportions of CX3CR1<sup>+</sup> cells among MHC-II<sup>high</sup> and MHC-II<sup>low</sup> adrenal gland macrophages from male and female CX3CR1<sup>GFP</sup> mice. ♂ n=11 and ♀ n=12. Data pooled from 2 independent experiments. (E) Mean Timd4 and Lyve1 fluorescence intensity among MHC-II<sup>high</sup> and MHC-II<sup>low</sup> adrenal gland macrophages from male and female mice. ♂ n=12 and ♀ n=13. Data pooled from 2 independent experiments. (F) Quantification of MHC-II<sup>low</sup> adrenal gland macrophage subsets according to Lyve1 and Timd4 expression in 7-week-old male and female mice. Timd4 subsets : ♂ n=11 and ♀ n=11. Data pooled from 2 independent experiments. Lyve1 subsets : ♂ n=5 and ♀ n=5. Data from one experiment. (G) Mean CD11c fluorescence intensity among MHC-II<sup>high</sup> and MHC-II<sup>low</sup> adrenal gland macrophages from male and female mice. ♂ n=13 and ♀ n=17. Data pooled from 3 independent experiments. (H) Clustering of adrenal gland macrophages from male and female CX3CR1<sup>GFP</sup> mice using unsupervised t-distributed stochastic neighbor embedding (tSNE) analysis of flow cytometry data. Panel : CD24 (BUV496) ; CD19 (BUV737) ; MHC-II (VioBlue) ; CD11b (BV510) ; CD45 (BV570) ; F4/80 (BV650) ; CX3CR1 (GFP reporter) ; CD86 (PE) ; CD64 (PE-Dazzle594) ; CD11c (PE-Cy5) ; CD80 (PerCP-Vio700) ; ICOSL (PE-Vio770) ; Ly6C (APC) ; CD40 (APC-Vio770). Data representative of 3 independent experiments. (I) tSNE representation of MHC-II and CX3CR1 expression levels in adrenal gland macrophages from male and female CX3CR1<sup>GFP</sup> mice. Data representative of 3 independent experiments. (J) tSNE representation and quantification of CD86, CD80, CD40 and ICOSL expression levels in adrenal gland macrophages from male and female CX3CR1<sup>GFP</sup> mice. ♂ n=13 and ♀ n=17. Pooled data from 2 (ICOSL) or 3 (CD86, CD80, CD40) independent experiments. (K) Fluorescence microscopy analysis of F4/80 and MHC-II expression in adrenal glands from 7-week-old male and female wild-type mice. Scale bar : 200μm. M (medulla); C (cortex). Data representative of at least 3 independent experiments. All data are represented in means ± SEM. Statistical analysis was performed using two-way ANOVA with Bonferroni's post-test (panels B, D, E, F, G and J) or two-tailed Mann-Whitney tests (panel G). ns p>0.05 ; \* p<0.05 ; \*\* p<0.01 ; \*\*\* p<0.001 ; \*\*\*\* p<0.0001.



## Sup. Fig. 4

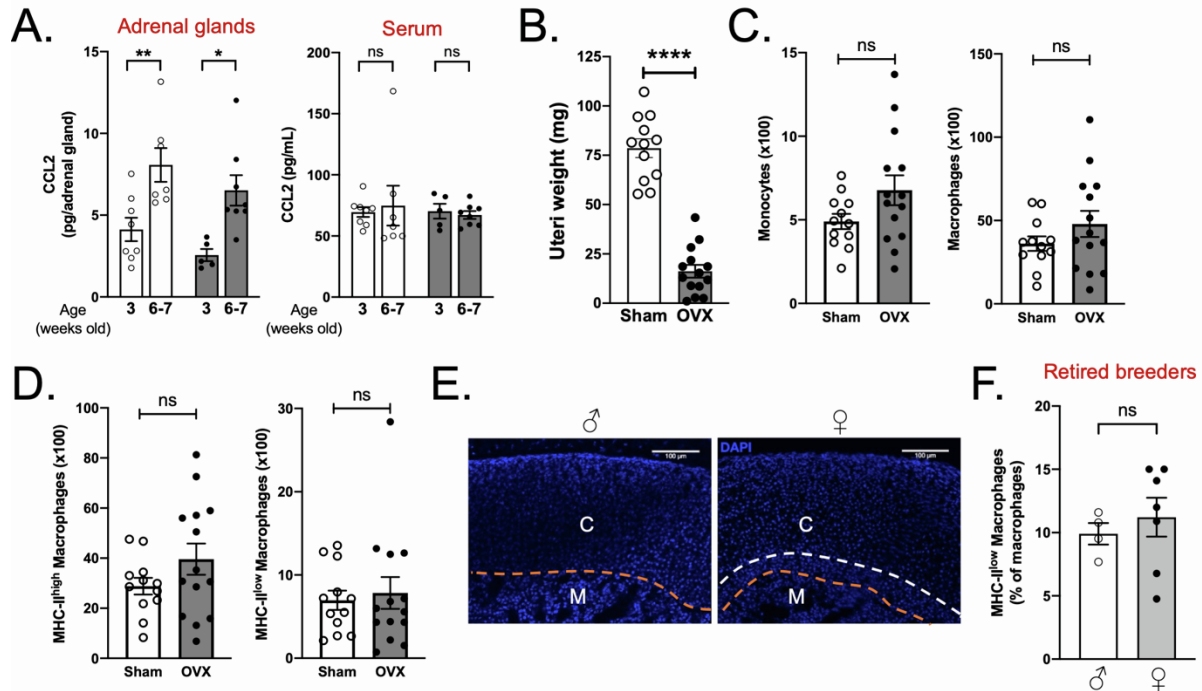

**Figure S4. Ovariectomy does not affect adrenal gland macrophage content. This figure is complementary to figure 5.**

(A) CCL2 levels in adrenal gland homogenates and serum from 3 (♂ n=8 and ♀ n=5) or 6 to 7 (♂ n=7 and ♀ n=8) week-old male and female wild-type mice. Data pooled from 4 independent experiments. (B) Weight of uteri from sham-operated (n=12) and OVX (n=14) mice. Data pooled from 2 independent experiments. (C) Quantification of adrenal gland monocytes and macrophages in ovariectomized (n=14) and sham-operated (n=12) wild-type mice. Data pooled from 2 independent experiments. (D) Quantification of adrenal gland MHC-II<sup>low</sup> and MHC-II<sup>high</sup> macrophages in ovariectomized (n=14) and sham-operated (n=12) wild-type mice. Data pooled from 2 independent experiments. (E) Confocal microscopy analysis of adrenal glands from male and female 4-week-old wild-type mice. Orange dots indicate the border between the cortex (C) and the medulla (M). The X-Zone is comprised between white and orange dots. Scale bar : 100um. (F) Proportions of MHC-II<sup>low</sup> adrenal gland macrophages in male and female retired breeders (♂ n=4 and ♀ n=7). Data pooled from 2 independent experiments. All data are represented in means ± SEM. Statistical analysis was performed using two-way ANOVA with Bonferroni's post-test (panel A) or two-tailed Mann-Whitney tests (panels B, C, D and F). ns p>0.05 ; \* p<0.05 ; \*\* p<0.01 ; \*\*\* p<0.001 ; \*\*\*\* p<0.0001.

# Sup. Fig. 5

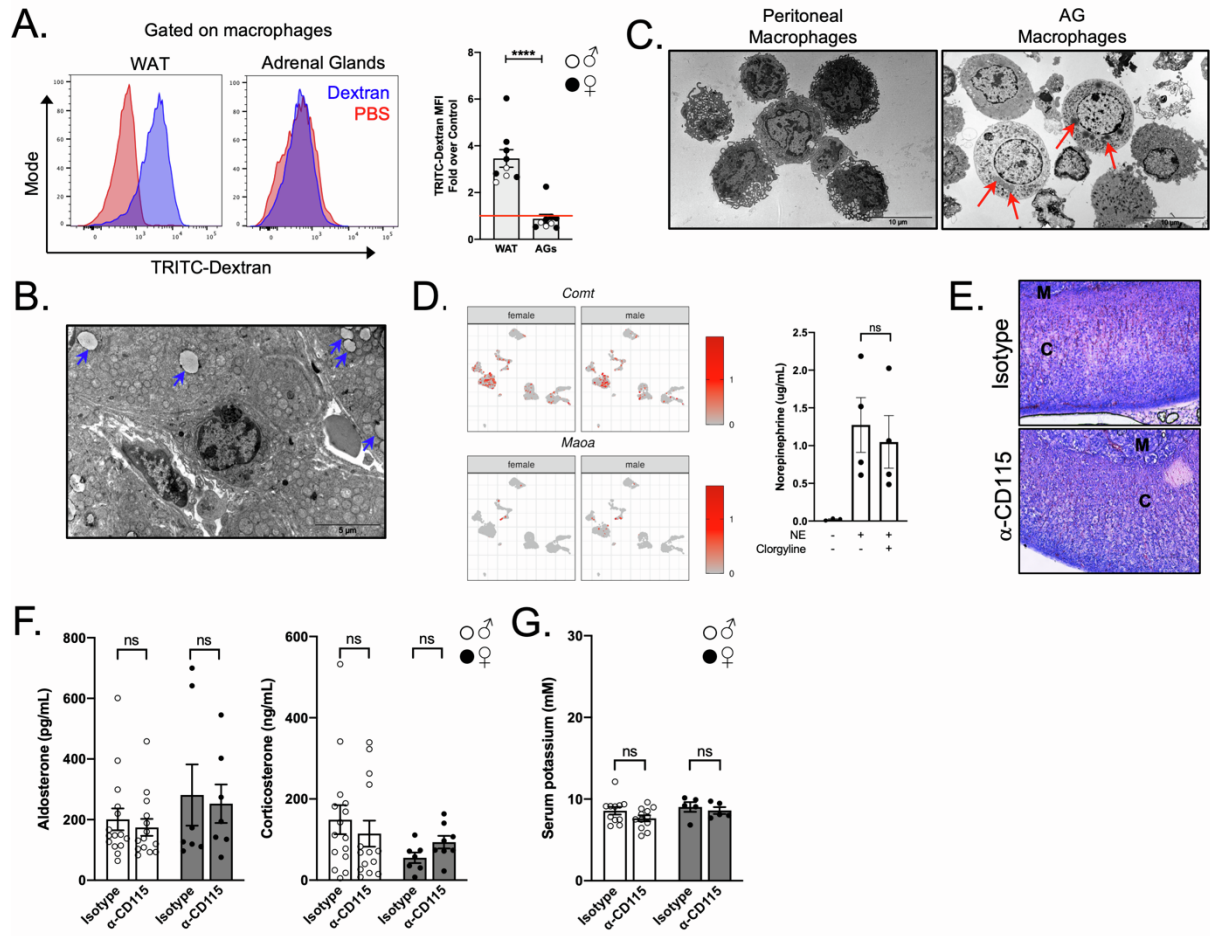

**Figure S5. Macrophage depletion does not alter adrenal gland architecture and hormone production at steady state. This figure is complementary to figure 6.**

(A) Representative flow cytometry plots (left) and quantification (right) of TRITC-Dextran uptake by adipose tissue and adrenal gland macrophages 20 minutes after intravenous injection of 1mg 65-85kDa TRITC-Dextran. (♂ n=3 and ♀ n=6). Data from one experiment. (B) Electron microscopy analysis of adrenal gland macrophages. Blue arrows indicate the presence of lipid droplets in stroma. Scale bar : 5 $\mu$ m. (C) Electron microscopy analysis of purified peritoneal and adrenal gland macrophages. Red arrows indicate the presence of lipid droplets in macrophages. Scale bar : 10 $\mu$ m. Data from one experiment. (D) (Left) scRNA-seq analysis of *Maoa* and *Comt* mRNA expression and (Right) norepinephrine levels after overnight culture of cell-sorted adrenal gland macrophages in the presence/absence of norepinephrine and/or clorgyline. n=3 (baseline) or 4 (+NE) biological replicates. Data from 3 pooled experiments. (E) Microscopy analysis of adrenal gland morphology in isotype control-treated and  $\alpha$ -CD115-treated wild-type mice using H&E staining. Data from one experiment. (F) Serum aldosterone and corticosterone levels in isotype control-treated (♂ n=15 and ♀ n=7) and  $\alpha$ -CD115-treated (♂ n=14 and ♀ n=7-8) male and female wild-type mice. (G) Serum K<sup>+</sup> levels in isotype control-treated (♂ n=11 and ♀ n=5) and  $\alpha$ -CD115-treated (♂ n=12 and ♀ n=5) male and female wild-type mice. Pooled data from 3 independent experiments. Statistical analysis was performed using two-way ANOVA with Bonferroni's post-test (panels F and G), one-way ANOVA with Bonferroni's post-test (panel D) or two-tailed Mann-Whitney tests (panel A). ns p>0.05 ; \* p<0.05 ; \*\* p<0.01 ; \*\*\* p<0.001 ; \*\*\*\* p<0.0001.

# Sup. Fig. 6

## A. PCA (vsd-based): all samples

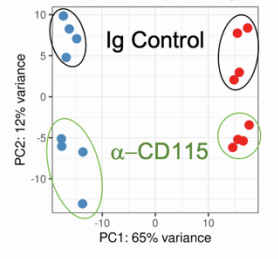

## B.

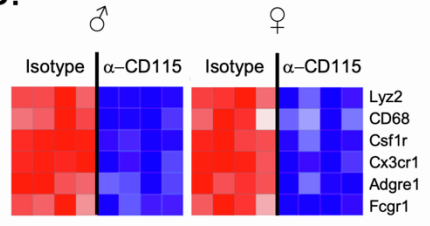

## C.

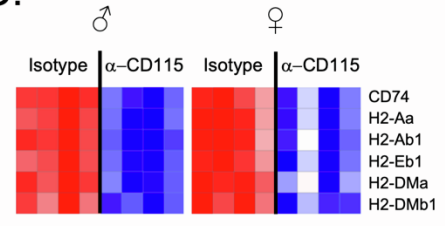

## D. Males

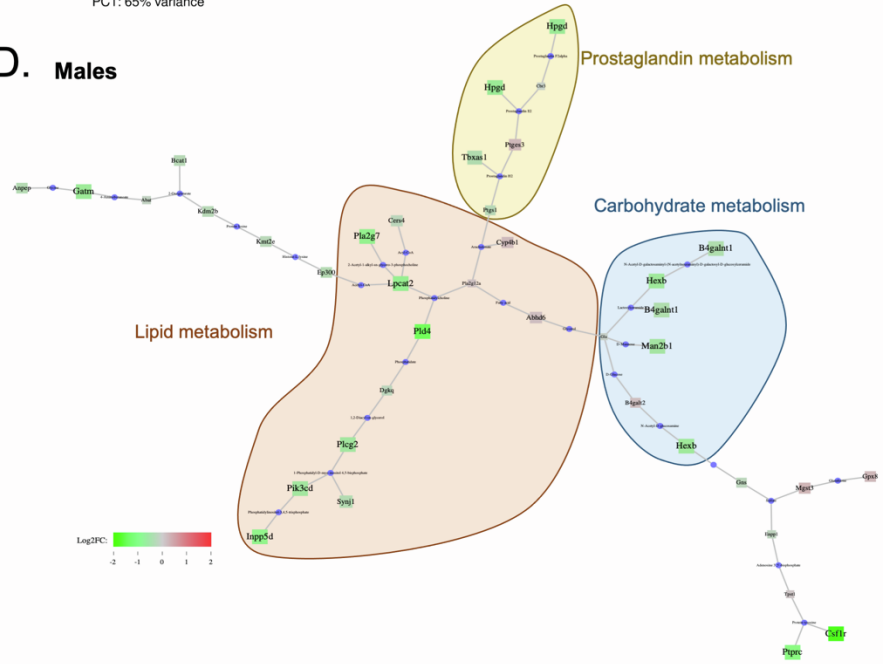

## Females

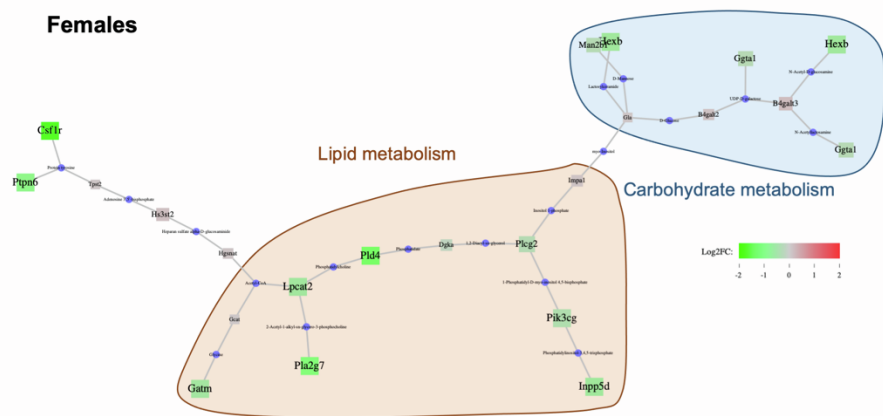

## E.

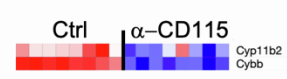

## F.

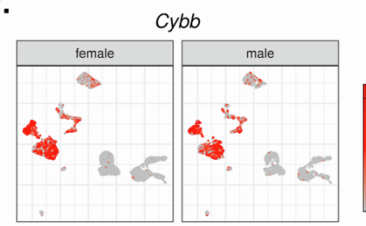

## G.

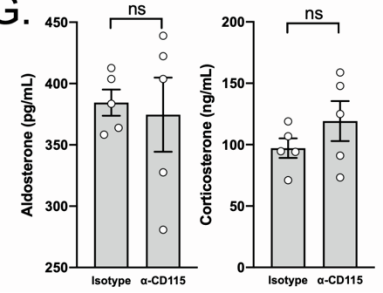

**Figure S6. Macrophage depletion affects adrenal gland lipid metabolism. This figure is complementary to figure 6.**

(A) Principal Component Analysis (PCA) of adrenal gland bulk RNA-seq from isotype control-treated and  $\alpha$ -CD115-treated male and female wild-type mice. (B) RNA-seq analysis of myeloid cell-related genes in adrenal glands from isotype control-treated and  $\alpha$ -CD115-treated male and female wild-type mice. (C) RNA-seq analysis of MHC-II-related genes in adrenal glands from isotype control-treated and  $\alpha$ -CD115-treated male and female wild-type mice. (D) Transcriptional analysis of metabolic pathways in adrenal glands from  $\alpha$ -CD115 or isotype control treated male and female mice. The size of nodes represent the significance of changes in gene expression : bigger size of nodes means lower p-values. A high resolution version of this panel is supplied as supplementary item 3. (E) RNA-seq analysis of *Cyp11b2* and *Cybb* expression in adrenal glands from isotype control-treated and  $\alpha$ -CD115-treated wild-type mice. (F) scRNA-seq analysis of *Cybb* mRNA expression. (G) Serum aldosterone and corticosterone levels in  $\alpha$ -CD115 (n=5) or isotype control-treated (n=5) female wild-type mice submitted to a 12-hour cold challenge. Data from one experiment. Statistical analysis was performed using two-tailed Mann-Whitney tests (panel G). ns p>0.05.
